# Supplementary material for: Genetic Analysis of Patients with Congenital Hypogonadotropic Hypogonadism: A Case Series
Source: MDPI journal article supplement (doi:10.3390/ijms24087428), 2023-04-18
Supplement: s1 [file s1]

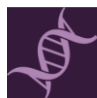

**Supplementary Table S1.** Genes involved in the pathogenesis of congenital hypogonadotropic hypogonadism [5].

| Function                                  | Genes                                                                                                                |
|-------------------------------------------|----------------------------------------------------------------------------------------------------------------------|
| GnRH neuron differentiation               | <i>FGF8/FGFR1, SOX2, CHD7, FGF17, IL17RD</i>                                                                         |
| GnRH neuron migration and axon projection | <i>ANOS1, PROK2/PROKR2, SEMA3A/PLXNA1, SEMA3E, NSMF, HS6ST1, WDR11, SOX10, FEZF1 IGSF10, DCC/NTN1, TUBB3, SMCHD1</i> |
| GnRH neuron homeostasis                   | <i>GNRH1, KISS1/KISS1R, TAC3/TACR3, LEP/LEPR, PCSK1, DXML2, KLB</i>                                                  |
| Defects in gonadotropic cells             | <i>GNRHR, NR0B1, PNOLA6, POLR3B</i>                                                                                  |
| Unclear                                   | <i>OTUD4, RNF216</i>                                                                                                 |

**Abbreviations.** *ANOS1*, Anosmin 1; *CHD7*, Chromodomain Helicase DNA Binding Protein 7; *DCC*, Deleted in Colorectal Carcinoma; *DXML2*, DMX-like 2; *FEZF1*, Fez family zinc finger protein 1; *FGF8*, Fibroblast Growth Factor 8; *FGF17*, Fibroblast Growth Factor 17; *FGFR1*, Fibroblast growth factor receptor 1; *GNRH1*, Gonadotropin Releasing Hormone 1; *GNRHR*, Gonadotropin Releasing Hormone Receptor; *HS6ST1*, Heparan Sulfate 6-O-Sulfotransferase 1; *IGSF10*, Immunoglobulin superfamily member 10; *IL17RD*, Interleukin 17 Receptor D; *KLB*, Klotho Beta; *LEP*, leptin; *LEPR*, leptin receptor; *KISS1*, kisspeptin 1; *KISS1R*, kisspeptin 1 receptor; *NR0B1*, Nuclear Receptor Subfamily 0 Group B Member 1; *NSMF*, NMDA receptor synaptonuclear signaling and neuronal migration factor; *NTN1*, netrin 1; *OTUD4*, OTU domain-containing protein 4; *PCSK1*, Proprotein Convertase Subtilisin/Kexin Type 1; *PLXNA1*, plexin a1; *PNOLA6*, Patatin-like phospholipase domain-containing protein 6; *POLR3B*, Polymerase III, RNA, subunit B; *PROK2*, Prokineticin 2; *PROKR2*, Prokineticin receptor 2; *RNF216*, Ring finger protein 216; *SEMA3A*, Semaphorin 3A; *SEMA3E*, Semaphorin 3E; *SMCHD1*, Structural Maintenance of Chromosomes flexible Hinge Domain Containing 1; *SOX2*, Sex determining region Y-box 2; *SOX10*, Sex determining region Y-box 10; *TAC3*, Tachykinin 3; *TACR3*, Tachykinin receptor 3; *TUBB3*, Tubulin Beta 3 Class III; *WDR11*, WD repeat-containing protein 11.

**Supplementary Table S2.** Customized gene panel for congenital hypogonadotropic hypogonadism/Kallmann syndrome.

| <b>Gene</b>         | <b>Gene MIM number</b> | <b>Inheritance</b> | <b>Chromosomal locus</b> | <b>OMIM Phenotype</b>                                   | <b>HH cases due to the gene variants*</b> |
|---------------------|------------------------|--------------------|--------------------------|---------------------------------------------------------|-------------------------------------------|
| <i>KISS1</i>        | 603286                 | AR                 | 1q32.1                   | HH, 13 with or without anosmia                          | <2% (nHH)                                 |
| <i>HS6ST1</i>       | 604846                 | AD                 | 2q14.3                   | HH, 15 with or without anosmia                          | <2% (KS or nHH)                           |
| <i>IL17RD</i>       | 606807                 | AD                 | 3p14.3                   | HH, 18 with or without anosmia                          | 2-5% (KS or nHH)                          |
| <i>PROK2</i>        | 607002                 | AD                 | 3p13                     | HH, 4 with or without anosmia                           | <2% (KS or nHH)                           |
| <i>GNRHR</i>        | 138850                 | AR                 | 4q13.2                   | HH, 7 with or without anosmia                           | 5-10% (nHH)                               |
| <i>TACR3</i>        | 162332                 | AR                 | 4q24                     | HH, 11 with or without anosmia                          | ~5% (nHH)                                 |
| <i>SPRY4</i>        | 607984                 | AD                 | 5q31.3                   | HH, 17 with or without anosmia                          | <2% (KS or nHH)                           |
| <i>SEMA3A</i>       | 603961                 | AD                 | 7q21.11                  | HH, 16 with or without anosmia                          | <2% (KS or nHH)                           |
| <i>FEZF1</i>        | 613301                 | AR                 | 7q31.32                  | HH, with or without anosmia                             | <2% (KS)                                  |
| <i>FGF17</i>        | 603725                 | AD                 | 8p21.3                   | HH, 20 with or without anosmia                          | <2% (KS or nHH)                           |
| <i>GNRH1</i>        | 152760                 | AR                 | 8p21.2                   | HH, 12 with or without anosmia                          | <2% (nHH)                                 |
| <i>FGFR1</i>        | 136350                 | AD                 | 8p11.23                  | HH, 2 with or without anosmia                           | ~10% (KS or nHH)                          |
| <i>CHD7</i>         | 608892                 | AD                 | 8q12.2                   | HH, 5 with or without anosmia                           | 5-10% (KS or nHH)                         |
| <i>NSMF</i>         | 608137                 | AD                 | 9q34.3                   | HH, 9 with or without anosmia                           | ---                                       |
| <i>FGF8</i>         | 600483                 | AD                 | 10q24.32                 | HH, 6 with or without anosmia                           | <2% (KS or nHH)                           |
| <i>WDR11</i>        | 606417                 | AD                 | 10q26.12                 | HH, 14 with or without anosmia                          | <2% (KS or nHH)                           |
| <i>FSHB</i>         | 136530                 | AR                 | 11p14.1                  | HH, 24 with or without anosmia                          | ---                                       |
| <i>TAC3</i>         | 162330                 | AR                 | 12q13.3                  | HH, 10 with or without anosmia                          | <2% (nHH)                                 |
| <i>DUSP6</i>        | 602748                 | AD                 | 12q21.33                 | HH, 19 with or without anosmia                          | <2% (KS or nHH)                           |
| <i>KISS1R</i>       | 604161                 | AR                 | 19p13.3                  | HH, 8 with or without anosmia                           | <2% (nHH)                                 |
| <i>LHB</i>          | 152780                 | AR                 | 19q13.33                 | HH, 23 with or without anosmia                          |                                           |
| <i>PROKR2</i>       | 607123                 | AD                 | 20p12.3                  | HH, 3 with or without anosmia                           | ~5% (KS or nHH)                           |
| <i>FLT3</i>         | 604808                 | AD                 | 20p12.1                  | HH, 21 with or without anosmia                          | <2% (KS or nHH)                           |
| <i>ANOS1 (KAL1)</i> | 300836                 | XLR                | Xp22.31                  | HH, 1 with or without anosmia (Kallmann syndrome 1, KS) | 5-10% (KS)                                |
| <i>SOHLH1</i>       | 610224                 | AR                 | 9q34.3                   | Hypergonadotropic hypogonadism, nonsyndromic            | ---                                       |
| <i>SOX10</i>        | 602229                 | AD                 | 22q13.1                  | Kallmann syndrome, with or without deafness             | 2-5% (KS)                                 |
| <i>AXL</i>          | 109135                 | AD                 | 19q13.2                  | HH                                                      | <2% (KS or nHH)                           |
| <i>CCDC141</i>      | 616031                 | AR                 | 2q31.2                   | KS                                                      | <2% (KS)                                  |

|               |        |    |         |    |                 |
|---------------|--------|----|---------|----|-----------------|
| <i>SEMA3E</i> | 608166 | AD | 7q21.11 | KS | <2% (KS or nHH) |
| <i>SRA1</i>   | 603819 | AR | 5q31.3  | HH | <2% (nHH)       |

**Abbreviations:** AD, autosomal dominant; AR, autosomal recessive; HH, hypogonadotropic hypogonadism; KS, Kallmann syndrome; nHH, normosmic hypogonadotropic hypogonadism. ANOS1, Anosmin 1; AXL, AXL receptor tyrosine kinase; CCDC141, Coiled-coil domain-containing protein 141; CHD7, Chromodomain Helicase DNA Binding Protein 7; DUSP6, Dual-specificity phosphatase 6; FSHB, Follicle-stimulating hormone, beta polypeptide; FEZF1, Fez family zinc finger protein 1; FGF8, Fibroblast Growth Factor 8; FGF17, Fibroblast Growth Factor 17; FGFR1, Fibroblast growth factor receptor 1; FLT3, FMS-related tyrosine kinase 3; GNRH1, Gonadotropin Releasing Hormone 1; GNRHR, Gonadotropin Releasing Hormone Receptor; HS6ST1, Heparan Sulfate 6-O-Sulfotransferase 1; IL17RD, Interleukin 17 Receptor D; LHB, luteinizing hormone, beta polypeptide; KISS1, kisspeptin 1; KISS1R, kisspeptin 1 receptor; NSMF, NMDA receptor synaptonuclear signaling and neuronal migration factor; PROK2, Prokineticin 2; PROKR2, Prokineticin receptor 2; SEMA3A, Semaphorin 3A; SEMA3E, Semaphorin 3E; SOHLH1, Spermatogenesis- and oogenesis-specific basic helix-loop-helix protein 1; SOX10, Sex determining region Y-box 10; SPRY4, Sprouty RTK signaling antagonist 4; SRA1, Steroid receptor RNA activator 1; TAC3, Tachykinin 3; TACR3, Tachykinin Receptor 3; WDR11, WD repeat-containing protein 11.

\*GeneReview, <https://www.ncbi.nlm.nih.gov/books/NBK1334/>, Rev. March, 2017.
